# Supplementary material for: The state of child nutrition in Ethiopia: an umbrella review of systematic review and meta-analysis reports
Source: Springer Nature journal article supplement (doi:10.1186/s12887-020-02301-8), 2020-08-26
Supplement: MOESM1 [file 18317514]

### Additional file 1: PubMed Search Strategy

| Search | Query                                                                                                                                                                                                                                                                                                                                                                                                                                                                                                                                                                                          | Hits*   |
|--------|------------------------------------------------------------------------------------------------------------------------------------------------------------------------------------------------------------------------------------------------------------------------------------------------------------------------------------------------------------------------------------------------------------------------------------------------------------------------------------------------------------------------------------------------------------------------------------------------|---------|
| #1     | (((((((((((((((((Stunting[MeSH Terms]) OR Wasting[MeSH Terms]) OR Underweight[MeSH Terms] OR Stunting[Title/Abstract] OR Underweight[Title/Abstract]) OR Under-weight[Title/Abstract]) OR Wasting[Title/Abstract]) OR Breastfeeding[MeSH Terms]) OR Complementary feeding[MeSH Terms]) OR Child feeding practice[MeSH Terms]) OR Dietary diversity[MeSH Terms]) OR Meal frequency[MeSH Terms]) OR Breastfeeding[Title/Abstract]) OR Complementary feeding[Title/Abstract]) OR Child feeding practice[Title/Abstract]) OR Dietary diversity[Title/Abstract]) OR Meal frequency[Title/Abstract]) | 1049827 |
| #2     | (((((((((Risk factor[MeSH Terms]) OR Prevalence[MeSH Terms]) OR Coverage[MeSH Terms]) OR Risk factor[Title/Abstract]) OR Prevalence[Title/Abstract]) OR Coverage[Title/Abstract]) OR Determinants[Title/Abstract]) OR Predictors[Title/Abstract])                                                                                                                                                                                                                                                                                                                                              | 295170  |
| #3     | (((((Review[MeSH Terms]) OR Review[Title/Abstract]) OR Systematic Review[Title/Abstract]) OR Meta-analysis[Title/Abstract])                                                                                                                                                                                                                                                                                                                                                                                                                                                                    | 804616  |
| #4     | #1 AND #2 AND #3                                                                                                                                                                                                                                                                                                                                                                                                                                                                                                                                                                               | 207     |

\*= Date of search: August 15, 2019
